# Supplementary material for: Pharmacokinetic Study of Withanosides and Withanolides from Withania somnifera Using Ultra-High Performance Liquid Chromatography-Tandem Mass Spectrometry (UHPLC-MS/MS)
Source: MDPI journal article supplement (doi:10.3390/molecules27051476), 2022-02-22
Supplement: s1 [file s1]

**Pharmacokinetic Study of Withanosides and Withanolides from *Withania somnifera* using Ultra-High Performance Liquid Chromatography-Tandem Mass Spectrometry (UHPLC-MS/MS)**

Siddharth J. Modi<sup>1,2#</sup>, Anshuly Tiwari<sup>1#</sup>, Chetana Ghule<sup>1#</sup>, Sandeep Pawar<sup>1#</sup>, Shubham Jagtap<sup>1</sup>, Ganesh Saste<sup>1</sup>, Ruchi Singh<sup>2</sup>, Amol Deshmukh<sup>3</sup>, Aboli Girme<sup>1\*</sup>, and Lal Hingorani<sup>1,2,3</sup>

<sup>1</sup>Analytical Development and Innovation Center, Pharmanza Herbal Pvt. Ltd., Anand-388435, Gujarat, India.

<sup>2</sup>New Product Development Department, Pharmanza Herbal Pvt. Ltd., Anand-388435, Gujarat, India.

<sup>3</sup>Clinical Research and Intellectual Property Rights, Pharmanza Herbal Pvt. Ltd., Anand-388435, Gujarat, India.

#Authors contributed equally.

**\*Corresponding author:** Dr Aboli Girme, Pharmanza Herbal Pvt. Ltd, Address- Plot # 214, Borsad-Tarapur Road, Nr. Vadadla Patiya, At & PO: Kaniya-388435, Tal: Petlad, Dist: Anand (Gujarat) India.  
Tel.: +91-7043534016/+91-9825063959. E-mail: [ardm@pharmanzaherbals.com](mailto:ardm@pharmanzaherbals.com)

## Supplementary Tables

**Table S1.** The linear equation, linear range, and LLOQ of the withanoside IV, withanoside V, withaferin A, 12-Deoxy-withastramonolide, withanolide A, withanolide B, and withanone in rat plasma samples.

**Table S2.** Intra- and inter-day precision and accuracies of the analytes in rat plasma samples, (ng/mL).

**Table S3.** Extraction recovery (ng/mL) of the constituents in rat plasma samples, ( $n = 6$ ).

**Table S4.** Matrix effect (ng/mL) for the determination of constituents in rat plasma samples, ( $n = 6$ ).

**Table S5.** Dilution integrity of analytes in 20-fold and 6-fold dilution (ng/mL), ( $n = 6$ ).

**Table S6.** Stability assays for the determination of constituents in rat plasma samples, ( $n = 6$ ).

**Table S1.** The linear equation, linear range, and LLOQ of the withanoside IV, withanoside V, withaferin A, 12-Deoxy-withastramonolide, withanolide A, withanolide B, and withanone in rat plasma samples.

| Analyte     | Linear equation               | Range (ng/mL)  | $r^2$  | LLOQ (ng/mL) |
|-------------|-------------------------------|----------------|--------|--------------|
| <b>WSIV</b> | $y = 0.8519229x + 0.02379023$ | 3.00 to 400.00 | 0.9976 | 3.00         |
| <b>WSV</b>  | $y = 2.828480x + 0.04256550$  | 3.00 to 400.00 | 0.9917 | 3.00         |
| <b>WFA</b>  | $y = 5.841658x + 0.1158392$   | 3.00 to 400.00 | 0.9958 | 3.00         |
| <b>WSL</b>  | $y = 2751826x + 0.03420022$   | 3.00 to 400.00 | 0.9972 | 3.00         |
| <b>WLA</b>  | $y = 1.731572x + 0.02476672$  | 3.00 to 400.00 | 0.9949 | 3.00         |
| <b>WLB</b>  | $y = 3.981638x + 0.02096910$  | 3.00 to 400.00 | 0.9946 | 3.00         |
| <b>WNO</b>  | $y = 15.34367x + 0.06067664$  | 3.00 to 400.00 | 0.9971 | 3.00         |

\*WSIV-withanoside IV; WSV-withanoside V; WFA- withaferin A; WSL-12-Deoxy-withastramonolide; WLA-withanolide A; WLB-withanolide B; WNO-withanone;  $r^2$ -correlation coefficient; LLOQ-lower limit of quantification.

**Table S2.** Intra and inter-day precision and accuracies of the analytes in rat plasma samples, (ng/mL).

| Analyte | Nominal concentration (ng/mL) | Intra-day 01 ( <i>n</i> = 6) |                  | Intra-day 02 ( <i>n</i> = 6) |                  | Intra-day 03 ( <i>n</i> = 6) |                  | Inter-day ( <i>n</i> = 6x3) |                  |
|---------|-------------------------------|------------------------------|------------------|------------------------------|------------------|------------------------------|------------------|-----------------------------|------------------|
|         |                               | Precision (RSD, %)           | Accuracy (RE, %) | Precision (RSD, %)           | Accuracy (RE, %) | Precision (RSD, %)           | Accuracy (RE, %) | Precision (RSD, %)          | Accuracy (RE, %) |
| WSIV    | 3.00                          | 6.17                         | 7.94             | 7.34                         | 1.39             | 4.21                         | 10.78            | 4.51                        | 6.67             |
|         | 10.05                         | 3.81                         | 7.35             | 2.36                         | -7.97            | 1.83                         | 8.20             | 8.91                        | 2.53             |
|         | 75.50                         | 4.21                         | -7.94            | 4.25                         | -0.82            | 1.64                         | 9.70             | 8.85                        | 0.31             |
|         | 200.50                        | 3.66                         | 4.25             | 3.82                         | 0.69             | 0.79                         | 11.61            | 5.28                        | 5.52             |
| WSV     | 3.00                          | 3.48                         | -2.61            | 3.36                         | -13.00           | 3.19                         | 10.22            | 11.90                       | -1.78            |
|         | 10.05                         | 4.19                         | -3.77            | 6.33                         | -1.88            | 7.59                         | 9.82             | 7.27                        | 1.37             |
|         | 75.50                         | 2.83                         | 1.87             | 3.84                         | 2.17             | 4.44                         | 5.22             | 1.80                        | 3.09             |
|         | 200.50                        | 3.86                         | 4.15             | 3.93                         | -1.95            | 4.08                         | 11.25            | 6.33                        | 4.49             |
| WFA     | 3.00                          | 4.42                         | -4.17            | 8.58                         | -0.89            | 5.00                         | 3.67             | 3.88                        | -0.44            |
|         | 10.05                         | 6.42                         | -3.92            | 7.57                         | -3.35            | 4.79                         | 3.08             | 3.93                        | -1.37            |
|         | 75.50                         | 2.62                         | 5.79             | 3.30                         | -5.58            | 3.64                         | 5.33             | 6.32                        | 1.85             |
|         | 200.50                        | 2.14                         | -6.25            | 2.76                         | -6.24            | 1.47                         | 8.40             | 8.57                        | -1.37            |
| WSL     | 3.30                          | 3.25                         | 0.38             | 8.26                         | -5.28            | 7.33                         | 1.00             | 3.53                        | -1.33            |
|         | 10.50                         | 8.88                         | 1.62             | 6.11                         | -8.68            | 3.18                         | 1.73             | 6.09                        | -1.80            |
|         | 76.00                         | 5.44                         | 9.06             | 2.21                         | -4.46            | 2.50                         | 4.16             | 6.65                        | 2.92             |
|         | 201.50                        | 3.03                         | -4.22            | 4.49                         | -5.39            | 1.79                         | 8.67             | 7.82                        | -0.31            |
| WLA     | 3.00                          | 5.70                         | -6.61            | 7.02                         | -12.83           | 7.20                         | 0.44             | 6.95                        | -6.33            |
|         | 10.20                         | 8.45                         | 0.05             | 7.71                         | -1.88            | 3.64                         | 5.35             | 3.73                        | 1.20             |
|         | 76.00                         | 7.33                         | 2.31             | 7.80                         | -1.07            | 2.67                         | 4.76             | 2.87                        | 2.00             |
|         | 201.50                        | 1.96                         | 0.36             | 3.70                         | -2.20            | 3.46                         | 5.04             | 3.63                        | 1.07             |
| WLB     | 3.00                          | 4.55                         | 1.28             | 7.53                         | 5.28             | 5.13                         | 0.11             | 2.72                        | 2.22             |
|         | 10.05                         | 7.71                         | -3.55            | 4.96                         | -0.97            | 4.59                         | -1.13            | 0.32                        | -0.87            |
|         | 75.50                         | 5.29                         | -3.08            | 3.04                         | -5.28            | 2.96                         | -6.51            | 1.83                        | -4.96            |
|         | 200.50                        | 3.34                         | 4.97             | 2.88                         | -9.04            | 3.46                         | -2.74            | 7.18                        | -2.27            |
| WNO     | 3.06                          | 5.52                         | -4.72            | 6.67                         | 2.78             | 1.79                         | 6.00             | 5.39                        | 1.33             |
|         | 10.20                         | 7.76                         | -0.70            | 4.65                         | -2.23            | 3.66                         | 9.47             | 6.23                        | 2.20             |
|         | 76.00                         | 2.75                         | 1.72             | 2.87                         | -5.14            | 4.03                         | 5.57             | 5.38                        | 0.72             |
|         | 201.50                        | 3.30                         | -3.83            | 2.79                         | -8.34            | 4.37                         | 11.25            | 10.29                       | -0.31            |

\* WSIV-withanoside IV; WSV-withanoside V; WFA- withaferin A; WSL-12-Deoxy-withastramonolide; WLA-withanolide A; WLB-withanolide B; WNO-withanone; RSD-relative standard deviation; RE-relative error.

**Table S3.** Extraction recovery (ng/mL) of the constituents in rat plasma samples, ( $n = 6$ ).

| Analyte     | Nominal concentration<br>(ng/mL) | Extraction recovery<br>(% $\pm$ SD) | Precision<br>(RSD, %) | Accuracy<br>(RE, %) |
|-------------|----------------------------------|-------------------------------------|-----------------------|---------------------|
| <b>WSIV</b> | 10.05                            | 95.38 $\pm$ 3.64                    | 2.49                  | 6.58                |
|             | 75.50                            | 92.06 $\pm$ 3.87                    | 2.96                  | -0.90               |
|             | 200.50                           | 99.84 $\pm$ 1.23                    | 3.66                  | 4.25                |
| <b>WSV</b>  | 10.05                            | 96.25 $\pm$ 4.02                    | 5.03                  | -0.87               |
|             | 75.50                            | 99.94 $\pm$ 1.84                    | 2.47                  | 3.19                |
|             | 200.50                           | 99.67 $\pm$ 5.07                    | 3.25                  | -4.21               |
| <b>WFA</b>  | 10.05                            | 96.10 $\pm$ 6.16                    | 4.78                  | -5.80               |
|             | 75.50                            | 99.96 $\pm$ 2.73                    | 0.64                  | -1.97               |
|             | 200.50                           | 93.75 $\pm$ 2.00                    | 1.34                  | -1.91               |
| <b>WSL</b>  | 10.50                            | 98.28 $\pm$ 4.76                    | 8.15                  | 0.98                |
|             | 76.00                            | 99.92 $\pm$ 4.04                    | 4.42                  | -0.90               |
|             | 201.50                           | 95.78 $\pm$ 2.90                    | 1.19                  | -1.19               |
| <b>WLA</b>  | 10.20                            | 96.73 $\pm$ 6.67                    | 5.72                  | 1.35                |
|             | 76.00                            | 98.94 $\pm$ 5.12                    | 3.39                  | 5.15                |
|             | 201.50                           | 98.96 $\pm$ 2.85                    | 2.80                  | -1.05               |
| <b>WLB</b>  | 10.05                            | 96.45 $\pm$ 7.46                    | 5.22                  | 7.93                |
|             | 75.50                            | 96.92 $\pm$ 5.13                    | 4.93                  | 2.18                |
|             | 200.50                           | 99.60 $\pm$ 2.91                    | 4.90                  | -0.55               |
| <b>WNO</b>  | 10.20                            | 99.29 $\pm$ 7.70                    | 3.30                  | -3.15               |
|             | 76.00                            | 99.71 $\pm$ 1.63                    | 2.08                  | -0.19               |
|             | 201.50                           | 96.16 $\pm$ 3.17                    | 1.60                  | -1.34               |

\* WSIV-withanoside IV; WSV-withanoside V; WFA- withaferin A; WSL-12-Deoxy-withastramonolide; WLA-withanolide A; WLB-withanolide B; WNO-withanone; SD-standard deviation; RSD-relative standard deviation; RE-relative error.

**Table S4.** Matrix effect (ng/mL) for the determination of constituents in rat plasma samples, ( $n = 6$ ).

| <b>Analyte</b> | <b>Nominal Concentration<br/>(ng/mL)</b> | <b>Matrix Effect<br/>(% <math>\pm</math> SD)</b> | <b>Precision<br/>(RSD, %)</b> | <b>Accuracy<br/>(RE, %)</b> |
|----------------|------------------------------------------|--------------------------------------------------|-------------------------------|-----------------------------|
| <b>WSIV</b>    | 10.05                                    | 85.61 $\pm$ 2.79                                 | 3.26                          | 11.05                       |
|                | 200.50                                   | 92.15 $\pm$ 3.85                                 | 4.18                          | 9.30                        |
| <b>WSV</b>     | 10.05                                    | 103.32 $\pm$ 4.14                                | 4.01                          | 9.47                        |
|                | 200.50                                   | 100.71 $\pm$ 5.09                                | 5.06                          | 6.79                        |
| <b>WFA</b>     | 10.05                                    | 87.96 $\pm$ 8.74                                 | 9.93                          | 10.12                       |
|                | 200.50                                   | 85.28 $\pm$ 2.16                                 | 2.53                          | 11.35                       |
| <b>WSL</b>     | 10.50                                    | 102.18 $\pm$ 3.62                                | 3.54                          | 7.47                        |
|                | 201.50                                   | 101.51 $\pm$ 1.87                                | 1.84                          | 8.93                        |
| <b>WLA</b>     | 10.20                                    | 97.53 $\pm$ 13.21                                | 13.55                         | 1.28                        |
|                | 201.50                                   | 88.43 $\pm$ 3.91                                 | 4.42                          | 10.63                       |
| <b>WLB</b>     | 10.05                                    | 109.77 $\pm$ 8.46                                | 7.71                          | -9.50                       |
|                | 200.50                                   | 95.96 $\pm$ 4.88                                 | 5.08                          | -5.12                       |
| <b>WNO</b>     | 10.20                                    | 105.61 $\pm$ 5.60                                | 5.30                          | -7.25                       |
|                | 201.50                                   | 86.12 $\pm$ 2.22                                 | 2.57                          | 7.52                        |

\* WSIV-withanoside IV; WSV-withanoside V; WFA- withaferin A; WSL-12-Deoxy-withastramonolide; WLA-withanolide A; WLB-withanolide B; WNO-withanone; SD-standard deviation; RSD-relative standard deviation; RE-relative error.

**Table S5.** Dilution integrity of analytes in 20-fold and 6-fold dilution (ng/mL), ( $n = 6$ ).

| Analyte | Nominal Concentration (ng/mL) | 20-Fold Dilution (ng/mL) | Precision (RSD, %) | Accuracy (RE, %) | 6-Fold Dilution (ng/mL) | Precision (RSD, %) | Accuracy (RE, %) |
|---------|-------------------------------|--------------------------|--------------------|------------------|-------------------------|--------------------|------------------|
| WSIV    | 450.00                        | 22.85±0.48               | 2.10               | -8.58            | 66.60±3.04              | 4.56               | -11.20           |
| WSV     |                               | 22.51±1.14               | 5.08               | -9.94            | 66.41±1.60              | 2.41               | -11.46           |
| WFA     |                               | 27.41±0.41               | 1.50               | 9.62             | 76.01±2.33              | 3.07               | 1.35             |
| WSL     |                               | 27.24±0.39               | 1.44               | 8.97             | 72.03±2.94              | 4.08               | -3.96            |
| WLA     |                               | 22.49±0.76               | 3.39               | -10.04           | 67.05±1.25              | 1.86               | -10.6            |
| WLB     |                               | 27.64±0.52               | 1.87               | 10.58            | 79.37±1.70              | 2.15               | 5.82             |
| WNO     |                               | 27.01±0.86               | 3.18               | 8.04             | 71.73±1.98              | 2.76               | -4.36            |

\* WSIV-withanoside IV; WSV-withanoside V; WFA- withaferin A; WSL-12-Deoxy-withastramonolide; WLA-withanolide A; WLB-withanolide B; WNO-withanone RSD-relative standard deviation; RE-relative error.

**Table S6.** Stability assays for the determination of constituents in rat plasma samples, ( $n = 6$ ).

| Analyte | Nominal concentration (ng/mL) | Autosampler stability (% $\pm$ SD) | Precision (RSD, %) | Accuracy (RE, %) | Freeze-thaw stability (% $\pm$ SD) | Precision (RSD, %) | Accuracy (RE, %) | Bench top Stability (% $\pm$ SD) | Precision (RSD, %) | Accuracy (RE, %) | Processed sample stability (% $\pm$ SD) | Precision (RSD, %) | Accuracy (RE, %) | Long-term stability (% $\pm$ SD) | Precision (RSD, %) | Accuracy (RE, %) |
|---------|-------------------------------|------------------------------------|--------------------|------------------|------------------------------------|--------------------|------------------|----------------------------------|--------------------|------------------|-----------------------------------------|--------------------|------------------|----------------------------------|--------------------|------------------|
| WSIV    | 10.05                         | 108.21 $\pm$ 2.00                  | 1.47               | -0.59            | 104.78 $\pm$ 5.59                  | 5.33               | 4.78             | 104.41 $\pm$ 4.84                | 5.91               | 6.70             | 104.41 $\pm$ 4.84                       | 5.22               | 6.02             | 10.21 $\pm$ 0.62                 | 6.03               | 2.10             |
|         | 200.50                        | 111.61 $\pm$ 0.88                  | 3.48               | -2.19            | 98.95 $\pm$ 5.47                   | 5.53               | -1.05            | 100.34 $\pm$ 10.45               | 7.76               | -1.94            | 101.10 $\pm$ 9.54                       | 8.09               | -0.51            | 192.17 $\pm$ 11.10               | 5.78               | -3.92            |
| WSV     | 10.05                         | 109.83 $\pm$ 8.35                  | 6.15               | 11.78            | 105.13 $\pm$ 6.95                  | 6.60               | 5.13             | 99.58 $\pm$ 8.68                 | 10.05              | 0.60             | 134.85 $\pm$ 90.10                      | 9.84               | -0.88            | 9.28 $\pm$ 0.25                  | 2.66               | -7.22            |
|         | 200.50                        | 111.25 $\pm$ 4.54                  | 3.22               | 10.61            | 99.38 $\pm$ 6.58                   | 6.62               | -0.62            | 91.74 $\pm$ 8.97                 | 6.26               | -9.28            | 90.47 $\pm$ 6.50                        | 6.22               | -9.07            | 183.24 $\pm$ 10.63               | 5.80               | -8.38            |
| WFA     | 10.05                         | 103.09 $\pm$ 4.95                  | 6.70               | -0.93            | 103.41 $\pm$ 5.62                  | 5.42               | 3.41             | 103.30 $\pm$ 8.41                | 8.02               | -2.78            | 103.30 $\pm$ 8.41                       | 6.14               | 1.20             | 9.49 $\pm$ 0.58                  | 6.16               | -5.12            |
|         | 200.50                        | 108.40 $\pm$ 1.59                  | 1.02               | 8.88             | 102.10 $\pm$ 5.76                  | 5.64               | 2.10             | 94.72 $\pm$ 6.57                 | 9.39               | 0.81             | 99.56 $\pm$ 5.11                        | 8.00               | 1.68             | 204.07 $\pm$ 8.81                | 4.32               | 2.03             |
| WSL     | 10.50                         | 101.72 $\pm$ 3.25                  | 6.90               | -2.75            | 101.34 $\pm$ 8.37                  | 8.25               | 1.34             | 97.92 $\pm$ 7.04                 | 8.93               | -4.53            | 121.14 $\pm$ 59.07                      | 9.18               | -5.15            | 9.46 $\pm$ 0.73                  | 7.74               | -5.4             |
|         | 201.50                        | 108.67 $\pm$ 1.94                  | 1.53               | 8.57             | 97.78 $\pm$ 4.28                   | 4.37               | -2.22            | 95.97 $\pm$ 7.13                 | 5.03               | -1.58            | 92.99 $\pm$ 8.83                        | 8.41               | -3.94            | 188.50 $\pm$ 5.37                | 2.85               | -5.75            |
| WLA     | 10.20                         | 105.35 $\pm$ 3.83                  | 3.16               | 8.55             | 102.18 $\pm$ 6.01                  | 5.88               | 2.19             | 102.00 $\pm$ 7.99                | 7.00               | 4.57             | 128.43 $\pm$ 68.06                      | 8.04               | 2.98             | 10.48 $\pm$ 0.59                 | 5.63               | 4.78             |
|         | 201.50                        | 105.04 $\pm$ 3.63                  | 3.65               | 8.11             | 98.89 $\pm$ 4.24                   | 4.29               | -1.11            | 103.63 $\pm$ 6.10                | 6.41               | 1.06             | 99.36 $\pm$ 6.79                        | 5.82               | -1.62            | 194.28 $\pm$ 5.94                | 3.06               | -2.86            |
| WLB     | 10.05                         | 98.84 $\pm$ 4.54                   | 6.39               | -2.65            | 116.31 $\pm$ 36.76                 | 6.43               | -0.12            | 95.51 $\pm$ 5.04                 | 6.21               | -5.15            | 113.48 $\pm$ 47.73                      | 5.88               | -2.88            | 9.50 $\pm$ 0.55                  | 5.76               | -5.03            |
|         | 200.50                        | 97.26 $\pm$ 3.36                   | 6.22               | 4.36             | 93.48 $\pm$ 6.55                   | 7.00               | -6.52            | 96.83 $\pm$ 6.66                 | 5.78               | -2.52            | 95.01 $\pm$ 5.83                        | 4.61               | -6.61            | 189.63 $\pm$ 5.10                | 2.69               | -5.19            |
| WNO     | 10.20                         | 109.47 $\pm$ 4.01                  | 7.81               | 3.48             | 104.24 $\pm$ 7.98                  | 7.81               | 3.00             | 96.31 $\pm$ 6.27                 | 10.95              | -2.70            | 112.07 $\pm$ 37.93                      | 6.53               | -1.47            | 9.76 $\pm$ 0.69                  | 7.09               | -2.37            |
|         | 201.50                        | 111.25 $\pm$ 4.86                  | 4.4                | 8.64             | 98.14 $\pm$ 4.74                   | 4.83               | -1.86            | 98.87 $\pm$ 9.47                 | 4.53               | -2.12            | 99.56 $\pm$ 4.91                        | 5.37               | -2.67            | 194.31 $\pm$ 8.31                | 4.28               | -2.84            |

\* WSIV-withanoside IV; WSV-withanoside V; WFA- withaferin A; WSL-12-Deoxy-withastramonolide; WLA-withanolide A; WLB-withanolide B; WNO-withanone; SD-standard deviation; RSD-relative standard deviation; RE-relative error.



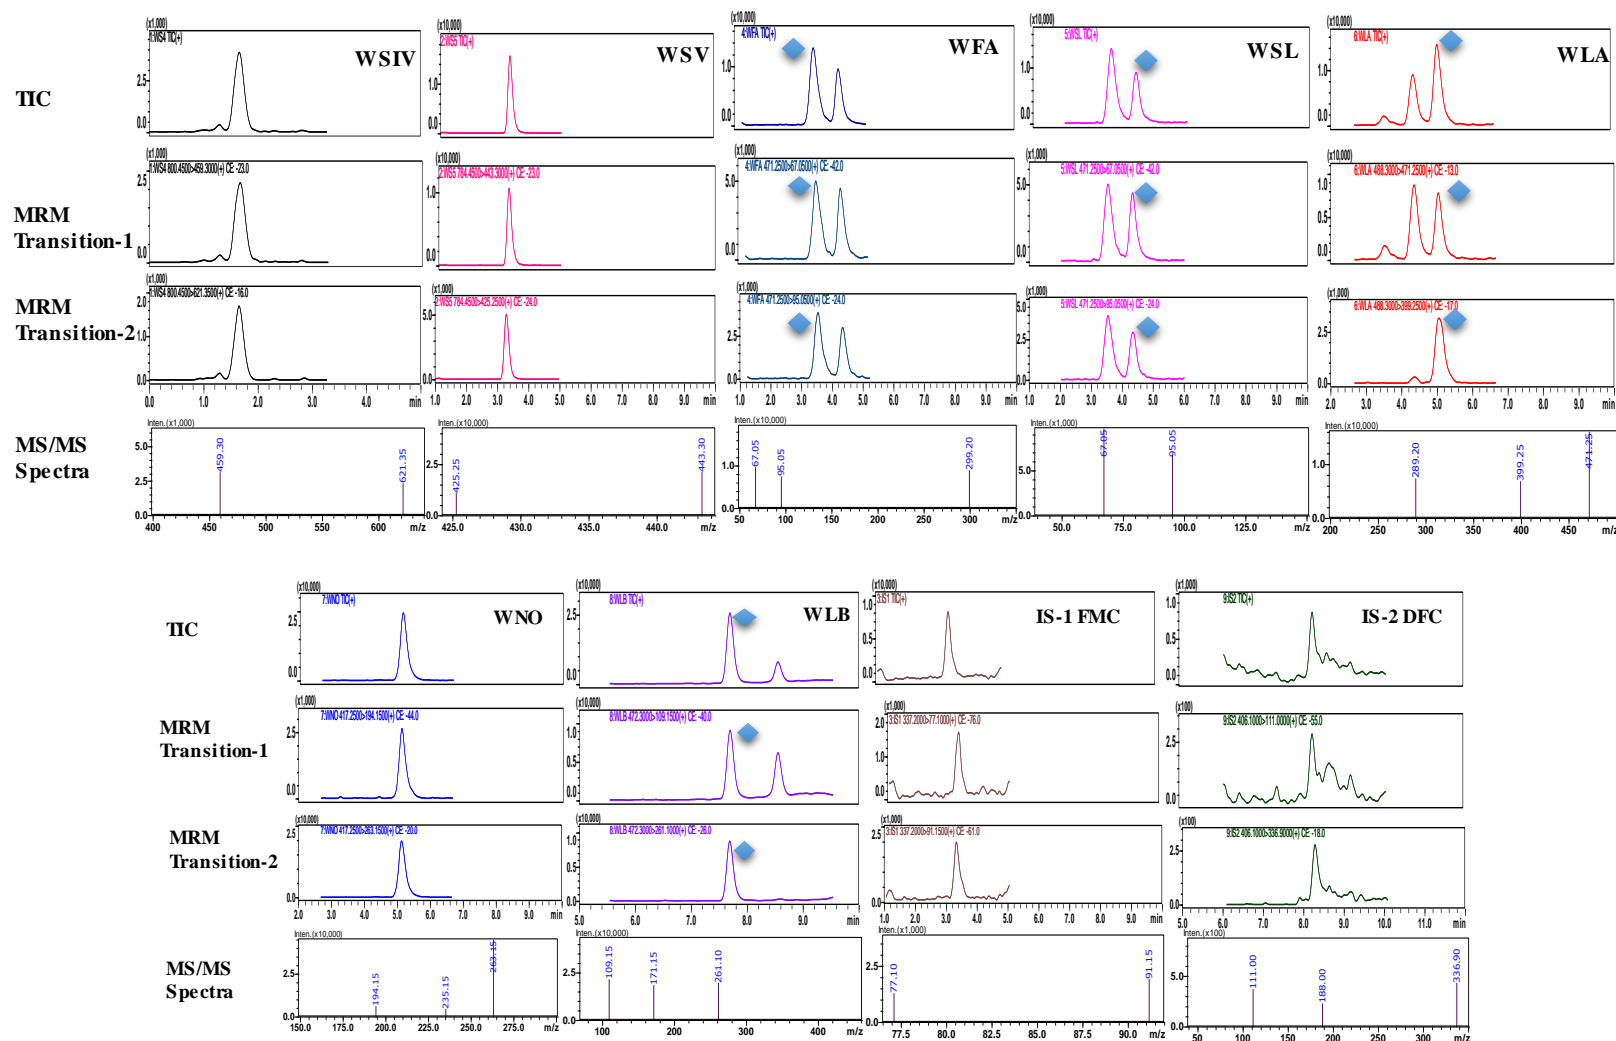

**Figure S1.** Typical MRM optimization with precursor ion and product ions (transitions) in the chromatogram with MS/MS spectra of seven WS analytes and internal standards in the developed UHPLC-MS/MS method.
